# Supplementary material
Source: PubMed Central journal article supplement (PMC8239266)
Supplement: ejhpharm-2020-002642supp001.pdf [file ejhpharm-2020-002642supp001.pdf]

## Appendix 1. The pharmacist intervention form

| PHARMACIST INTERVENTION FORM                                                                                           |                                                                      |
|------------------------------------------------------------------------------------------------------------------------|----------------------------------------------------------------------|
| 📅 DATE: / /                                                                                                            | 📁 INTERVENTION N°:                                                   |
|                                                                                                                        | 📄 CENTER N°:                                                         |
| <b>PATIENT:</b>                                                                                                        | <b>Hospital ward:</b>                                                |
| Last name:                                                                                                             | <input type="checkbox"/> Psychiatry                                  |
| First name:                                                                                                            | <input type="checkbox"/> Acute care                                  |
| Age:            years / Weight:   Kg                                                                                   | <input type="checkbox"/> Long term care                              |
| Sex: <input type="checkbox"/> M <input type="checkbox"/> F                                                             | <input type="checkbox"/> Rehabilitation ward                         |
| <b>1- DRUG RELATED PROBLEM</b> (1 choice):                                                                             | <b>DRUG NAME (INN):</b>                                              |
| 1 <input type="checkbox"/> Non conformity to guidelines or contra-<br>indication                                       | <b>3- DRUG CLASSIFICATION (ATC):</b>                                 |
| 2 <input type="checkbox"/> Untreated indication                                                                        | <input type="checkbox"/> A Alimentary tract & metabolism             |
| 3 <input type="checkbox"/> Subtherapeutic dosage                                                                       | <input type="checkbox"/> B Blood & blood forming organs              |
| 4 <input type="checkbox"/> Supratherapeutic dosage                                                                     | <input type="checkbox"/> C Cardiovascular system                     |
| 5 <input type="checkbox"/> Drug without indication                                                                     | <input type="checkbox"/> D Dermatological                            |
| 6 <input type="checkbox"/> Drug interaction                                                                            | <input type="checkbox"/> G Genito urinary system & sex hormones      |
| ○ To be taken into account                                                                                             | <input type="checkbox"/> H Systemic hormonal preparations            |
| ○ Use with caution                                                                                                     | <input type="checkbox"/> J Anti-infective for systemic use           |
| ○ Combination to be avoided                                                                                            | <input type="checkbox"/> L Anti-neoplastic & immunomodulating agents |
| ○ Combination contra-indicated                                                                                         | <input type="checkbox"/> M Musculo-skeletal system                   |
| ○ Documented but not in VIDAL®                                                                                         | <input type="checkbox"/> N Nervous system                            |
| 7 <input type="checkbox"/> Adverse drug reaction                                                                       | <input type="checkbox"/> P Antiparasitic products                    |
| 8 <input type="checkbox"/> Improper administration                                                                     | <input type="checkbox"/> R Respiratory system                        |
| 9 <input type="checkbox"/> Failure to receive drug                                                                     | <input type="checkbox"/> S Sensory organs                            |
| 10 <input type="checkbox"/> Drug monitoring                                                                            | <input type="checkbox"/> V Various                                   |
| <b>2- INTERVENTION</b> (1 choice):                                                                                     | <b>4- INTERVENTION FOLLOW-UP:</b>                                    |
| 1 <input type="checkbox"/> Addition of a new drug                                                                      | <input type="checkbox"/> Accepted                                    |
| 2 <input type="checkbox"/> Drug discontinuation                                                                        | <input type="checkbox"/> Non accepted                                |
| 3 <input type="checkbox"/> Drug switch                                                                                 | <input type="checkbox"/> Non assessable                              |
| 4 <input type="checkbox"/> Change of administration route                                                              |                                                                      |
| 5 <input type="checkbox"/> Drug monitoring                                                                             |                                                                      |
| 6 <input type="checkbox"/> Administration modalities optimisation                                                      |                                                                      |
| 7 <input type="checkbox"/> Dose adjustment                                                                             |                                                                      |
| <b>DETAILS</b> ⇒If necessary, give details on any aspects of the detected DRP and describe the intervention. precisely |                                                                      |
| <b>Context</b>                                                                                                         |                                                                      |
| <b>Problem</b>                                                                                                         |                                                                      |
| <b>Intervention</b>                                                                                                    |                                                                      |
